# Supplementary material for: Children’s views on research without prior consent in emergency situations: a UK qualitative study
Source: PubMed Central journal article supplement (PMC6009563; doi:10.1136/bmjopen-2018-022894), 2018-06-09
Supplement: bmjopen-2018-022894.reviewer_comments.pdf [file bmjopen-2018-022894.reviewer_comments.pdf]

## PEER REVIEW HISTORY

BMJ Open publishes all reviews undertaken for accepted manuscripts. Reviewers are asked to complete a checklist review form (<http://bmjopen.bmj.com/site/about/resources/checklist.pdf>) and are provided with free text boxes to elaborate on their assessment. These free text comments are reproduced below.

### ARTICLE DETAILS

|                            |                                                                                                                                                                      |
|----------------------------|----------------------------------------------------------------------------------------------------------------------------------------------------------------------|
| <b>TITLE (PROVISIONAL)</b> | CHILDREN'S VIEWS ON RESEARCH WITHOUT PRIOR CONSENT IN EMERGENCY SITUATIONS: A UK QUALITATIVE STUDY                                                                   |
| <b>AUTHORS</b>             | Roper, Louise; Sherratt, Frances C.; Young, Bridget; McNamara, Paul; Dawson, Angus; Appleton, Richard; Crawley, Esther; Frith, Lucy; Gamble, Carrol; Woolfall, Kerry |

### VERSION 1 – REVIEW

|                        |                                                  |
|------------------------|--------------------------------------------------|
| <b>REVIEWER</b>        | Kristien Hens<br>Universiteit Antwerpen, Belgium |
| <b>REVIEW RETURNED</b> | 17-Apr-2018                                      |

|                         |                                                                                                                                                                                                                                                                                                                                                                                                                                                                            |
|-------------------------|----------------------------------------------------------------------------------------------------------------------------------------------------------------------------------------------------------------------------------------------------------------------------------------------------------------------------------------------------------------------------------------------------------------------------------------------------------------------------|
| <b>GENERAL COMMENTS</b> | This is a good paper based on qualitative research with children who have experience with emergency care, on their views on participating in research without prior consent. As such, it fills a gap in knowledge, as the opinions of children have been traditionally largely ignored. I had no real comments on methodology, results or discussion. Maybe a formal definition of assent could be given in the introduction for those not familiar with this terminology. |
|-------------------------|----------------------------------------------------------------------------------------------------------------------------------------------------------------------------------------------------------------------------------------------------------------------------------------------------------------------------------------------------------------------------------------------------------------------------------------------------------------------------|

|                        |                                                        |
|------------------------|--------------------------------------------------------|
| <b>REVIEWER</b>        | Karen Goddard<br>BC Cancer, Vancouver Center<br>Canada |
| <b>REVIEW RETURNED</b> | 23-Apr-2018                                            |

|                         |                                                                                                                   |
|-------------------------|-------------------------------------------------------------------------------------------------------------------|
| <b>GENERAL COMMENTS</b> | Interesting and unique work - it would be worthwhile exploring this question further in adolescent patients alone |
|-------------------------|-------------------------------------------------------------------------------------------------------------------|

### VERSION 1 – AUTHOR RESPONSE

#### Reviewer 1

This is a good paper based on qualitative research with children who have experience with emergency care, on their views on participating in research without prior consent. As such, it fills a gap in knowledge, as the opinions of children have been traditionally largely ignored. I had no real comments on methodology, results or discussion. Maybe a formal definition of assent could be given in the introduction for those not familiar with this terminology.

Response: We would like to thank the reviewer for their comments. We have added a definition of assent to the background section.

#### Reviewer 2

Interesting and unique work - it would be worthwhile exploring this question further in adolescent patients alone

Response: We would like to thank reviewer 2 for their suggestion on exploring this question further with adolescent patients and can confirm we aim to explore this in the future.

Editorial office comments:

You have cited reference #29 right after reference #26 and reference number #34 right after 31 which makes your citations incorrect. Please review again your main document and ensure that all references will be cited and will appear in ascending order.

Response: We have refreshed endnote and can confirm that the reference numbers are now in ascending order unless the reference has been used in an earlier part of the document.

- Please provide a more detailed contributor ship statement. It needs to mention all the names/initials of authors along with their specific contribution/participation for the article.

- Response: this additional detail has been added

We have also addressed the other submission queries raised.
